1 **TITLE:** DNA analysis of a large collection of shark fins from a US retail shop: species composition,  
2 global extent of trade and conservation - a Technical Report from the Monterey Bay Aquarium

3 **AUTHORS:** Stephen R. Palumbi,<sup>a,1</sup> Kristin M. Robinson,<sup>a</sup> Kyle S. Van Houtan,<sup>b,c</sup> Salvador J.  
4 Jorgensen<sup>b</sup>

5 **AFFILIATIONS:** <sup>a</sup> Department of Biology, Hopkins Marine Station, Stanford University, Pacific  
6 Grove, California 93950 USA; <sup>b</sup> Monterey Bay Aquarium, Monterey, California 93940 USA; <sup>c</sup>  
7 Nicholas School of the Environment, 450 Research Drive, Durham, North Carolina 27708 USA.

8 <sup>1</sup> Send correspondence to: [spalumbi@stanford.edu](mailto:spalumbi@stanford.edu), [sjorgensen@mbayaq.org](mailto:sjorgensen@mbayaq.org)

9 **KEY WORDS:** Shark finning, wildlife trafficking, IUU fishing, elasmobranchs

10 **RUNNING HEAD:** Shark fin forensics

11 **WORD COUNT:** 7,324

12 **No. REFERENCES:** 22

13 **No. FIGURES:** 3

14 **No. TABLES:** 3

15  
16  
17  
18  
19 **ABSTRACT**

20 We identified shark fins sampled across the entirety of a shark fin shop that had operated on the west  
21 coast of the United States until 2014. From these specimens we obtained 963 species identifications  
22 with Cytochrome oxidase (COI) sequencing and 1,720 identifications with control region (CR)  
23 sequences. We found 36-39 distinct species with COI and 38-41 with CR. Of the species identified,  
24 16-23 are currently listed as Endangered or Vulnerable on the IUCN Red List, an additional 2 are  
25 considered data deficient, and 7 currently listed under CITES Appendix II. Of the 2.5 tonnes of fins  
26 from this collection, we estimated 56-66% (CR or COI, respectively) come from CITES-listed species  
27 or those the IUCN considers threatened or data deficient. Most of these species occur outside of the  
28 United States EEZ, comprising a global set of species that is common in most fin surveys. The  
29 principal target shark fishery in the United States (spiny dogfish; *Squalus acanthias*) has no fins in our  
30 collection. Fins seen abundantly in our collection include pelagic species such as thresher, mako,  
31 oceanic whitetip, silky, blue and hammerhead sharks, as in previous samples of the shark fin supply  
32 chain. However, in addition, we see a large flood of blacktip, dusky, sandbar, and smalltail sharks that  
33 are common in shallow coastal waters. This may indicate that the global market for shark fins takes  
34 sharks from nearshore coastal zones, all over the world. Abundant species in the fin shop included  
35 globally-distributed species such as scalloped hammerheads and shortfin mako sharks, but also  
36 regionally-restricted species such as finetooth, blacknose, and Caribbean Reef sharks found only in the  
37 western Atlantic or Caribbean. Specimens identified from rare species of particular conservation  
38 concern included the wedgetail genus *Rhyncobatus* and the white shark. Both molecular markers  
39 performed well in identifying most fins, achieving a similar degree of taxonomic certainty. The  
40 universal primers for COI regularly amplified bacteria in wet fin samples, but the CR primers were  
41 able to return shark sequences even from these degraded samples. However, the CR primers amplified  
42 a second gene, likely a pseudogene, in some important and abundant species, and seriously  
43 underestimated some species of high conservation concern such as the thresher sharks.

## 44 INTRODUCTION

45 Shark fins comprise a lucrative, extensive global market that leads to the death of 70-100 million  
46 sharks a year (Worm et al., 2013), largely for the use of fin collagen (ceratotrichia) in shark fin soup.  
47 A recent study estimates that the majority of shark fin harvests are unsustainable, illegal, and that the  
48 volume traded has dramatically increased over the last decade (Sadovy de Mitcheson et al., 2018).  
49 Extensive capture of ocean-going sharks in long-line and net fisheries has led to the global collapse of  
50 many shark species (Baum et al., 2003; Nicholas K. Dulvy et al., 2008). However, the extent of the  
51 shark fin trade suggests that many other species are being similarly affected (Fields et al., 2018;  
52 Steinke et al., 2017). Recent assessments furthermore indicate some coastal shark populations have  
53 declined nearly 90% in the last 50 years (Martin et al., 2016). Efforts to monitor impacts from trade  
54 have been impeded, in part, by the extensive processing of fin products. Though some fins are traded  
55 with skin on, and with many morphological features intact, many are traded with most features  
56 removed, defying easy morphological-based cataloging.

57 Molecular tools have been used extensively to discover the identity of shark fin products in  
58 trade, particularly by testing fins in large wholesale markets (Clarke, Magnussen, Abercrombie,  
59 McAllister, & Shivji, 2006). Such tests have shown the widespread occurrence of ocean going sharks  
60 such as blue sharks, oceanic white tip sharks, thresher sharks, hammerhead sharks and mako sharks.  
61 But coastal species have increasingly been observed. Recently, effort has shifted to tests of retail  
62 outlets that likely integrate supply chains over months or years (Cardeñosa et al., 2018; Feitosa et al.,  
63 2018; Fields et al., 2018). For example, Fields et al. (2018) surveyed 92 retail markets in Hong Kong  
64 in 2014-2015 and processed 3,800 samples with a small piece of the COI gene, identifying them to the  
65 species level. They found 59 species and 17 other groups that could not be well identified. Cardeñosa  
66 et al. (2018) extended this survey to a total of 9,200 samples between 2014-2016 with 80%  
67 identification rate totaling 82 species or complexes. Feitosa et al. (2018) surveyed several retail fish  
68 markets in northern Brazil from 2014-2016, and from government inspections obtained in 2007,  
69 identifying 17 mostly regional and coastally-distributed species from 427 fins. In other cases, reliance  
70 on relatively small data sets [ $n=72$  in (Steinke et al., 2017)] may not show the complete spectrum of  
71 commercial species. Another issue is that short DNA sequences can sometimes fail to differentiate  
72 closely related species. The balance between large sample numbers and a gene region sufficient to  
73 determine species identity has been difficult to achieve. Another opportunity is to compare retail  
74 outlets in Asia – especially at the heart of the fin trade in Hong Kong – with retail outlets in other parts  
75 of the world that have different local shark fisheries and consumer demand.

76 Here we test 1,720 fins collected from a retail outlet on the west coast of the US that was  
77 shuttered after shark fin sales were banned. We use sequences of the mitochondrial control region  
78 (Giles, Riginos, Naylor, & Ovenden, 2016), compared to published data sources, to estimate the  
79 identity of fins on the basis of sequence similarity and phylogenetic placement. For a subset of 961  
80 fins, we also sequenced a region of the COI gene, giving us a comparative data set to test the ability of  
81 these two gene regions to deliver accurate identifications. Both data sets gave very similar results,  
82 showing the existence of up to 41 species in this retail collection. Detailed comparisons suggest that in  
83 some species some putative control region sequences are likely to be nuclear pseudogenes. In other  
84 samples, bacterial contamination renders COI amplification impossible but CR data appear robust.

85

## 86 METHODS

### 87 *Sample collection*

88 These data are free and open to the public, and were collected from fins provided by Jenny Giles in a  
89 collaborative research program involving Dr. Giles, Steve Palumbi, and Sal Jorgenson focused on  
90 genetic identification of shark market products at the Monterey Bay Aquarium and Stanford

91 University (Giles et al. submitted). The samples were derived from a larger collection of fins with a  
92 range of physical conditions. Some fins occurred in a dried state, with skin attached (DR). Other dried  
93 fins had their skin removed (DRR). Some fins were more processed –wet ceratotrichia from multiple  
94 fins were pressed together in sheets (WC). Samples from disparate parts of each of these sheets were  
95 punched out and individual ceratotrichia were processed. Representative fins from each separate box  
96 or container were collected.

97 We used the IUCN Red List and CITES determinations to classify the conservation status of  
98 the identified species. As per previous studies, we consider species listed as data deficient to be  
99 threatened, as a central reason for being data poor is low population abundance, and most often when  
100 data deficient species are eventually classified they become threatened (N K Dulvy et al., 2014;  
101 Jenkins & Van Houtan, 2016).

#### 102 *DNA sequencing and alignment*

103 DNA extractions were performed using NucleoSpin® Spin Columns (Macherey-Nagel). DNA was  
104 amplified and sequenced using standard published methods. For COI amplifications, we used modified  
105 Folmer COI primers [FishF1, FishF2, FishR1, FishR2 from (Ward, Zemlak, Innes, Last, & Hebert,  
106 2005)], amplified with an extension temperature of 54°C, extension of 72°C, and denaturing of 94°C  
107 for 60 seconds each. For the putative control region, 374-521 bp was amplified using the primers GwF  
108 (5'-CTGCCCTTGGCTCCCAAAGC-3') (Pardini et al., 2001) and 470r2 (5'-  
109 GCCATTAAGGGAAGTAGRGGGA-3'), published in Giles et al. (2016).

110 Amplicons were treated with 0.75 units Exonuclease I and 1 unit Shrimp Alkaline Phosphatase (New  
111 England Biolabs) per 8 microlitre of template, and were sequenced in one direction using the forward  
112 PCR primer by Elim Biopharmaceuticals. Sequence data were aligned and ambiguities resolved  
113 manually using CodonCodeAligner ver. 7.1.2 (CodonCode Corporation, Dedham, MA). Data sets of  
114 cleaned sequences are in Appendix 1 (Master COI data file) and Appendix 2 (Master CR data file).

#### 115 *Constructing COI data base*

116 All data used in analyses were derived from public data bases. We used the 1035 sequences of the COI  
117 data base of Wong, Shivji, and Hanner (2009) to extract and download one or two individual COI  
118 sequences from each of 75 shark species. We were unable to find a COI sequence of the large tooth  
119 sawfish *Pristis microdon*, which appears in our Control Region data set (see below), although *Pristis*  
120 *zijsron* is available (accession EU398989.1). Likewise, two recently described mitochondrial lineages  
121 of the wedgfish genus *Rhyncobatus* (Giles et al., 2016) and the scoophead hammerhead *Sphyrna media*  
122 are available from control region sequences but not COI. Our final reference COI collection consists  
123 of 177 sequences (sequences appended to Master COI data file, appendix 1).

#### 124 *Constructing the CR database*

125 All data used in analyses were derived from public databases. We found 2876 sequences from  
126 Genbank with mitochondrial control region sequences from Elasmobranchs (download Dec. 2017),  
127 including 363 full mitochondrial genomes. From this set we chose one or two sequences from each  
128 species. Because these were of variable length, we trimmed each sequence to the length between our  
129 amplification primers (Giles et al., 2016). In addition, we collected representative control region  
130 sequences from one representative product sample of each of the species that we found in our  
131 Cytochrome oxidase survey. In total our reference data base has 122 sequences from 79 species  
132 (sequences appended to Master CR data file, appendix 2).

#### 133 *BLAST searches*

134 We compared all of our market COI sequences and CR sequences to the full NCBI BLAST data base  
135 (in Jan 2018), and recorded the closest species match for each sample. Those species matches were

136 added to the sequence sample name in FASTA format for ease in comparing phylogenetic and  
137 sequence distance results. (see appendix 1 and 2)

#### 138 *Comparing COI sequences phylogenetically*

139 We added 961 COI sequences from individual fin or fin products to the 177 sequences reference set  
140 and aligned them using the MAFFT server (Kato & Standley, 2013). We aligned sequences with  
141 default conditions and created a Neighbor-joining phylogenetic tree using Jukes-Cantor sequence  
142 evolutionary parameters with bootstrap branch reliability scores. We inspected the resulting tree for  
143 clades containing conspecific sequences from Genbank and that contained market sequences  
144 determined to be closest to those same species by BLAST. We thus combine a phylogenetic clade-  
145 based criterion with a sequence-distance BLAST criterion for assignment of COI sequences to species.  
146 For crowded parts of the tree, particularly the genus *Carcharhinus*, we excluded all other sequences  
147 and re-constructed the tree.

#### 148 *Comparing CR sequences phylogenetically*

149 As a first step, we aligned all 1893 sequences plus 122 references using the MAFFT server. Because  
150 control region sequences evolve so quickly, there were no conserved bases in the alignment on which  
151 to build a well resolved tree. As a result, we constructed a UPGMA tree in MAFFT based on overall  
152 genetic distances. This analysis identified four major clades, allowing us to split the data set. The first  
153 clade included the lamnid sharks, and contained 423 sequences, including 346 sequences that  
154 subsequently were determined to be pseudogenes. The *Carcharhinus* sharks consisted of 1044  
155 sequences. The genus *Sphyrna* contained 234 sequences, and finally, other Carchariniiform sharks  
156 consisted of 187 sequences. We re-aligned the sequences within these groups and rebuilt neighbor-  
157 joining trees with bootstrap support. As in the analysis of the COI data set, we compared the  
158 sequences within defined clades on these phylogenetic trees to their closest BLAST match in our  
159 reference database. We also cross referenced the closest BLAST match of the COI sequence from the  
160 same fin in 816 cases for which we have both data sets.

#### 161 *Assigning names to sequences*

162 We determined species names three ways. First, we determined the best match between each of our  
163 control region sequences to available databases. Second, we determined the best match of our COI  
164 sequences to these databases. Third, we examined the relationship among sequences in our collection  
165 and public reference sequences phylogenetically, looking for clusters of sequences that form species  
166 groups. Those species groups were defined by diagnostic bases, by statistical reliability of branches  
167 (bootstrap percentages), or by simple clustering. The strongest species names were defined by high  
168 confidence identification (>97% match for CR and >99% for COI) for both genes and high confidence  
169 phylogenetic clustering. For some fins we only had one DNA sequence, and so we relied on high %  
170 match for that sequence and phylogenetic clustering.

171

## 172 **RESULTS**

173 Below, we detail the results of the dual analyses on COI and control region sequences. Each set of  
174 results steps through a set of phylogenetic trees that show the relationship of each sequence we  
175 collected to a reference set of sequences from public databases. The large format, full resolution trees  
176 are included as figures.

177

### *COI sequences*

178 In total we identified 963 fins as coming from 36-41 species. The uncertainty in species numbers is  
179 because certain pairs of species are difficult to distinguish with COI data and some species have  
180 multiple clades. Table 1 presents the summary results from COI and the control region. Also shown in  
181 this table are the sample sizes for each region, and the phylogenetic criteria used to assign species

182 names to samples. The COI tree that we used is in a high definition pdf file in Figure 1A (all COI tree  
183 w/ bootstraps). This figure can be expanded to examine any portion of the large, complex tree.

184 A taxonomic breakdown of the COI results shows that no market fins were derived from  
185 dogfish (*Squalus*), catfish (*Apristurus*), carpet sharks (*Nebrius*), or Angel sharks (*Squatina*). Marketing  
186 of dogfish fins is less likely because of their small size. However, dogfish make up the biggest shark  
187 fishery in the U.S. and there have been calls for their fins to be exempted from state and national shark  
188 fin bans.

#### 189 Lamniform sharks

190 The lamnid market samples contain all three species of thresher sharks (*Alopias*), two species of mako  
191 (*Isurus*), and the salmon shark (*Lamna ditrops*). COI clades have high bootstrap support (97%-99%)  
192 across these species, except for *A. superciliosus*, the bigeye thresher, with bootstrap support of 55%  
193 (Suppl. Fig 1A “all COI tree w bootstraps”). This species has the highest number of samples in our  
194 COI data base (n=170), closely followed by *Isurus onchyrhyncus*, the shortfin mako shark (n=168).  
195 DCA1-0004, which has a White Shark control region sequence is not in the COI data set.

#### 196 Carcharhiniform sharks

197 Genus *Carcharhinus*. The largest number of congeneric species is in the genus *Carcharhinus* and is  
198 reflected in the large number of market samples that cluster within this genus phylogenetically. Close  
199 genetic ties among these species makes some identifications with COI difficult. However, there were a  
200 number of cases where species formed well-supported clades in the bootstrap tree (Fig. 1B:  
201 *Carcharhinus* COI tree w bootstraps). The Caribbean reef shark (*C. perezii*) is a common shark in the  
202 Caribbean, and is represented here by a single COI sample in a clade defined by an 85% bootstrap.  
203 Likewise, six sequences of *C. leucas* (bull shark) are defined by a 61% bootstrap value. This  
204 *Carcharhinus* COI tree includes 14 other species clades with 41-93% bootstrap values and a total of  
205 124 sequences (Table 1).

206 However, many other species of *Carcharhinus* are not well distinguishable by bootstrap  
207 phylogenetic trees because they differ by few substitutions (Wong et al., 2009). In some cases, there  
208 are diagnostic nucleotide substitutions that link sequences to certain species [(Wong et al., 2009),  
209 Table 3]. For example, our bootstrap tree shows many market samples in a large undifferentiated set  
210 representing reference sequences for *C. falciformis*, *isodon*, *galapagensis* and *obscurus*. Yet, *C.*  
211 *falciformis* and *C. isodon* each have two diagnostic bases in the COI region, and *C. galapagensis* can  
212 be distinguished from *C. obscurus* at two others. We used these diagnostic SNPs (listed in our Table  
213 1) to provide species names and could then compare these names to the clades in the phylogenetic  
214 analysis. As a result, a UPGMA tree shows a *C. falciformis* clade that corresponds largely to the 59  
215 sequences that contain the *C. falciformis* diagnostic SNPs. Likewise, a *C. isodon* clade in the UPGMA  
216 tree corresponds to the 15 sequences that show the diagnostic *C. isodon* SNPs. Diagnostic SNPs in  
217 COI do not appear to exist to distinguish *C. galapagensis* and *C. obscurus* (Wong et al., 2009).  
218 However, two SNPs define the COI clade that contains these two species and in our COI data set, we  
219 observe 59 sequences. Another problematic species mixture is the sandbar and bignose sharks, *C.*  
220 *plumbeus* and *C. altimus*. These cannot be distinguished by COI sequence alone and make up 17  
221 sequences in our COI data base. For *C. acronotus*, we find two distinct sequence clades that BLAST to  
222 this species at 96% or 100% identity (n=3, n=9, respectively). Whether the three sequences with lower  
223 identity in a separate clade represent a different species will require further research. The widespread  
224 blacktip reef shark (*Carcharhinus limbatus*) forms a UPGMA clade with 97 sequences. Less widely  
225 distributed is the smalltail shark (*C. porosus*), found from the Gulf of Mexico to northern Brazil.  
226 Despite its small size and restricted range, we found 33 sequences.

#### 227 Hammerhead sharks



228 The hammerhead clade within the Carcharhinoformes is represented in our data set by six of the eight  
229 named species. The local endemic *Sphyrna gilberti* (Quattro, Driggers III, Grady, Ulrich, & MA,  
230 2013) is missing, possibly because there is no recorded COI sequence. *S. zygaena* is also missing from  
231 our COI data, although this species occurs in the CR data set. *S. lewini* occurs in three separate clades.  
232 Clade I, with ten sequences of *Sphyrna lewini* appears outside the main *Sphyrna* clade in the bootstrap  
233 phylogeny. This group contains sequences only 96% identical to a second clade of *S. lewini* that  
234 occurs more deeply imbedded in the *Sphyrna* clade. These two intraspecific clades have the same COI  
235 amino acid sequence and differ at only silent sites. This group is also 100% identical to a number of *S.*  
236 *lewini* sequences on Genbank. The second *lewini* clade has the most hammerhead sequences in our  
237 sample (n=56) and also has several voucher reference sequences on Genbank with 100% identity.  
238 These two clades may represent different species, but we will count them together in our data  
239 summary.

240 The third *S. lewini* clade has no Genbank or BOLD reference sequences. Our sequences that  
241 fall into this clade have 11 CR sequences that BLAST to *S. corona* rather than to *S. lewini*. As a result,  
242 this third clade, is probably *S. corona*.

#### 243 Other Carcharhiniform sharks

244 Within the family Carcharhinidae, but outside the genus *Carcharhinus*, several genera have defined  
245 clades and are found in our collection. These include the tiger shark (*Galeocerdo cuvier*, n=6), and  
246 two species of lemon sharks (*Negaprion*, n=6). *Rhizoprionodon* species (sharpnose sharks) are extremely  
247 similar in their COI sequences and our phylogenetic approach cannot distinguish *R. porosus* from  
248 *terraenovae* for these 27 sequences. By contrast, *R. lalandii* and *R. acutus* appear to have slightly  
249 different COI sequences but do not appear in the COI data set.

250 Outside the family Carcharhinidae, there are market samples from a number of Carcharhiniform  
251 sharks in different families. The school shark, *Galeorhinus galeus* occurs in a small clade of eight  
252 samples. Batch BLAST searches originally identified our *G. galeus* sequences as coming from *C.*  
253 *dussumieri* or *C. obscurus*. However, a manual recheck shows 99-100% identity with the Wong et al.  
254 (2009) sequences of *G. galeus*. Two market sequences were included in the clade that included the  
255 genus *Mustelus*. A manual BLAST shows this sample to be 100% identical to *M. lunulatus*. The other  
256 sequence was named by BLAST as *M. canis*, and is 100% identical to other *M. canis* in Genbank.

#### 257 Poor sequence reads

258 In addition to these 969 full length, high quality sequences, we obtained 149 sequences with poorer  
259 read quality or shorter length. Phylogenetic analysis of these sequences using the same Genbank  
260 reference libraries reveals a similar number and distribution of species as the higher quality sequences.  
261 In particular, no species were seen in this set that had strong placement in species clades not included  
262 in the previous analyses. Because these phylogenetic placements were in general more equivocal than  
263 for the high quality sequence, we do not include them in our data summary. In addition, we produced  
264 287 COI sequence reads that were such poor quality that they had lengths under 300 bp (n=144) or  
265 between 300 and 500 bp (n=143). These sequences were not analyzed further.

#### 266 Bacterial amplification of shark products

267 The final category of COI sequences is a set of 369 amplification products from fin samples that  
268 BLAST to bacteria. Of these 244 are identified as *Pseudomonas fluorescens*, *P. sp.* or *P. veronii* (n=62,  
269 174, 8 respectively). The rest are identified as generic bacteria, or in the genera *Kangiella*,  
270 *Oceanimonas*, *Ensifer*, or *Vibrio*. Poor sequence quality reduced BLAST confidence in 97 sequences.  
271 Most of these bacterial sequences (311 out of 369) are derived from wet ceratotrichia packaged to  
272 allow rapid use in restaurants.

273

274

### CR Sequences

275 BLAST searches of our CR sequences on Genbank find a >95% match to publicly available data for  
276 1,528 of our sequences. Embedded in that number are 1,496 sequences with a >97% match. Left  
277 behind are 346 without a reputable >95% match. The largest part of that group is a set of sequences  
278 that show a maximum of 77-80% match to any control region sequence in the publicly available  
279 control region data for sharks. Below we suggest that these are pseudogenes and conduct a separate  
280 analysis to ascertain their value in fin identification.

281 For each clade in each of the phylogenetic trees (see methods), we counted the number of fin  
282 CR sequences for which there was the same closest species match for CR and COI (CR=COI), the  
283 number for which the two sequences did not match (CR<>COI), the number of samples for which we  
284 did not have COI sequence (No COI), and the number of reference sequences from the database. In  
285 total, we counted 1888 CR sequences, of which 496 matched the COI sequence, 320 did not match,  
286 and 1072 had no COI sequence. The breakdown of these sequence matches by species is in Table 2.

#### 287 Genera outside major clades

288 There are no sequences in our CR data set from the dogfish *Squalus*, or any sequences in this family, a  
289 conclusion that matches our COI data set. In the wedgfish genus *Rhyncobatus*, we find four species  
290 with high bootstrap support (n=6,4,1,1 respectively). This genus is undergoing taxonomic revision  
291 (e.g. Giles et al. 2016) and the names of two of these species are not yet determined. The two fins that  
292 are identified in the genus *Mustelus* in the COI data set were not sequenced as part of the CR data set,  
293 and this genus does not appear in any other sample.

#### 294 Carcharhiniformes

295 The large number of insertions and deletions in the CR data set interferes with bootstrap analysis  
296 because there are few conserved sequence positions that can be included. However, a bootstrap tree  
297 shows distinct clades including sequences identified by Genbank samples as the blue shark *Prionace*  
298 *glauca* (bootstrap 100%, n=72), *Rhizoprionodon porosus* (bootstrap 89%, n=25), *Negaprion acutidens*  
299 and *N. brevirostris* (bootstrap 49%, N=5,54, resp.), *Galeocerdo cuvier* (bootstrap 100%, n=15), and  
300 *Triaenodon obesus* (bootstrap 100%, n=3). (See Fig 2. "Other genera CR tree").

301 In addition, there are a large number of sequences that cluster in the genus *Carcharhinus*. To  
302 improve tree resolution, these were grouped separately into a separate sequence file trimmed to 475  
303 bases to match reference sequences, and run in MAFFT to produce a large UPGMA tree (Fig. 3  
304 *Carcharhinus* CR tree). This improved tree still shows poor bootstrap resolution among most  
305 *Carcharhinus* CR sequences. Nevertheless, within this tree, a series of clades defines a large number  
306 of species and sequences. We assign a species name to fin sequences based on their inclusion in  
307 distinct sequence clades named by reference samples from Genbank. Further confidence in these  
308 clades and assignments comes from evaluating these assignments based on whether the CR  
309 identification matches the COI identification. In a few cases, no Genbank sequence exists, and we  
310 assign clade names based on COI assignments from the same fins. The following summarizes these  
311 results from the bottom to the top of the tree.

312 *C. porosus*, the blacktip shark, occurs in several large clades of similar sequences (ca. 99%  
313 identical, n=107 total). *C. limbatus* is the most abundant species and occurs in two major clades (n  
314 =132, 127 respectively). Two representative sequences from those two clades DCA1\_0172 and  
315 DCA1\_0173 are 98.6% identical, differing at 4 transitions and 2 transversions. By contrast, *C. isodon*  
316 has one small clade of sequences (n=28), highly similar to control regions from whole mitochondrial  
317 genomes for this species. A group of 19 sequences cluster together but show highest BLAST hits in  
318 the 96-97% identity range for a variety of *Carcharhinus* species. The COI sequences of five of these  
319 also show similarity to a large number of different species, never the same as the best CR BLAST hit.  
320 It is not possible to determine what species these 19 sequences derive from these data.

321 For COI, *C. plumbeus* and *C. altimus* form a group that cannot be easily distinguished.  
322 Although there are CR sequences for *C. plumbeus* in public data bases, there are currently no *C.*  
323 *altimus* CR sequences. In our CR data set, *C. plumbeus* sequences make up a large clade (n=76). Two  
324 of the sequences form a clade within this clade and have high affinity to COI *C. altimus* data (100%)  
325 and lower affinity to *C. plumbeus* CR data (98-99%). Whether these two sequences represent *C.*  
326 *altimus* (and the others represent *C. plumbeus*) will demand a series of positively identified individuals  
327 sequenced for the control region.

328 A single sequence of *C. brachyurus* occurs in our data set, clusters well with the reference  
329 sequence and has a COI sequence highly similar (100%) to *C. brachyurus*. In this clade is also a  
330 subclade of *C. brevipinna* with 22 sequences. A large clade of sequences of *C. obscurus* occurs in  
331 three subclades. Subclade 1 has four sequences with high similarity to the reference *C. obscurus* whole  
332 mt genome. A second, large clade shows 98-99% similarity to the first clade, with 109 sequences. A  
333 third clade is a mixture of sequences with highest affinity to *C. obscurus* (n=16) or *C. perezii* (n=8).  
334 One sequence in this third clade is 99% identical to *C. perezii*: this same fin has a 99% COI identity to  
335 *C. perezii*. Whether this clade of 24 sequences actually represents *C. perezii* might require further  
336 sampling. The species *C. longimanus* shows a single clade with 90 sequences, whereas *C.*  
337 *melanopterus* occurs in a clade of 8. A clade of *C. acronotus* has 64 sequences, and *C. leucas* appears  
338 with 18. The second most abundant species is *C. falciformus* (n=179) which occurs in a single clade in  
339 our data set.

340 Last, there is a clade of 34 sequences that show no more than 94-96% identity to the closest  
341 control region sequences in Genbank. Of the 12 fins with matching COI sequence, there is 100%  
342 identity to *C. amblyrhynchos* in nine of them. (The three other fins have *Alopias* COI sequences.) There  
343 is no *C. amblyrhynchos* CR sequence on Genbank, but we provisionally ascribe these 23 sequences to  
344 *C. amblyrhynchos* based on their match to COI.

#### 345 Hammerhead clade

346 The hammerhead group is represented by 234 sequences from the same species and clades as the COI  
347 data set with the addition of four sequences from *Sphyrna zygaena*. Unlike the Carcharinids, bootstrap  
348 values for hammerhead species assignments were high – ranging from 70-100% (Table 1). As in the  
349 COI data set, there were two separate clades of control region sequences in *S. lewini* and a separate  
350 clade for *S. corona*. There were 38 sequences of *S. mokarran*, two of which appeared in a related but  
351 3-4% divergent clade. (Fig 4: *Sphyrna* CR tree).

#### 352 Pseudogene sequences in Lamnid sharks

353 Our phylogenetic data and BLAST searches for the CR sequences show a virtual absence of *Isurus* or  
354 *A. pelagicus*, despite the large occurrence of these taxa in the COI data set. Many CR sequences from  
355 fins identified with COI in *Isurus* and *Alopias* are a poor match to vouchered CR sequences. For  
356 example, sample DCA1-0745 has an *Alopias pelagicus* COI sequence (100% identical to  
357 JN315429.1), but its CR sequence is only 75% identical to the control region sequence from the *A.*  
358 *pelagicus* mtDNA genome sequence on Genbank (NC\_022822.1). The closest match to the CR  
359 sequence of DCA1-0745 is to a Lamnid shark in the genus *Megachasma*, at 77% identity. Overall, we  
360 have 299 sequences that BLAST best to this genus at 77-81% identity.

361 To investigate this further, we generated a phylogenetic tree from control region sequences of  
362 Lamnid species from Genbank including *Isurus* and *Alopias* (Fig. 5). Genbank sequences from full  
363 mitochondrial genomes group together in this clade, along with sequences from other lamnid sharks  
364 including two *Isurus* species, *A. pelagicus* and a large number of our market sequences from *A.*  
365 *superciliosus*. (red labels in Figure 5). However, most of our market sample CR sequences from  
366 lamnid sharks form a clade separate from the clade defined by vouchered whole mitochondrial  
367 genomes. (upper, black labelled samples in Fig. 5). The other clade differs by about 20-24% and has



368 no voucher sequences from full mitochondrial genomes. Instead it has exclusively sequences we  
369 generated with our CR primers from market samples. These include most of our market sequences  
370 from *I. onchyrhincus*, *I. paucus*, and *Alopias pelagicus* samples.

371 One overall explanation for these data is that our control region primers typically amplify a  
372 different, but related, gene region in *Isurus* and most *Alopias* sharks. Because there are no duplicate  
373 control region sequences in the *Alopias* full mt genome, this duplicate, related gene region is likely to  
374 be a mitochondrial pseudogene (e.g., Bensasson, Zhang, Hartl, & Hewitt, 2001).

#### 375 Species differences show lower divergence among pseudogenes

376 The clade of sequences from validated mitochondrial genomes differ between species more than do  
377 our amplified fragments from the other clade. For example, nucleotide divergence of *I. paucus* and *I.*  
378 *oxyrhincus* is 8% for Genbank mitochondrial CR sequences: transversions outnumber transitions 19 to  
379 12. Between the *I. paucus* and *I. oxyrhincus* sequences we amplified in the other clade, we find only  
380 1.5% divergence (4 transitions and 3 transversions) along with 18 insertion/deletions. High divergence  
381 in the validated mitochondrial clade is expected given the generally higher rate of molecular evolution  
382 in mtDNA (Avice, 2012). By comparison, COI sequences from these same two *I. paucus* and *I.*  
383 *oxyrhincus* individuals differed at 12% of 631 sites, including 58 transitions and 17 transversions,  
384 suggesting that the lower sequence clade in Figure 6 is evolving much like other mtDNA genes.

#### 385 True Lamnid mtDNA CR sequences in some species

386 The genus *Isurus* comprises a sizeable fraction of our COI data set, but there are only three sequences  
387 from our CR data that BLAST highly and cluster phylogenetically to the available *Isurus* CR  
388 sequences. Likewise, *Alopias pelagicus* is common in our COI data set but absent in the CR data set  
389 despite a reference control region sequence from the complete mitochondrial genome of this species.  
390 By contrast, we have 72 sequences of *Alopias superciliosus* that form a good clade with the control  
391 region sequence from the mitochondrial genome of this species (lower clade in Figure 6). In addition  
392 there are sequences from *I. oxyrhincus* (n=1), and *I. paucus* (n=2) in the clade of true CR sequences.

#### 393 Two genes amplify from CR primers in some species

394 Multiple sequence products from individual fins can complicate identification. In our case, we  
395 sometimes find sequences from different individuals of the same species in different clades: for  
396 example, sequences from two *I. oxyrhincus* individuals identified as conspecifics by COI sequence  
397 appear in different CR clades and differ by 21%. Likewise, phylogenetic trees of *Alopias superciliosus*  
398 CR sequences from our fin sample suggest a mixture of valid control region sequences and pseudo-CR  
399 data (Fig. 6, versus Fig. 7). Altogether, the phylogenetic tree shows 72 sequences of *A. superciliosus*  
400 CR and 11 pseudoCR. The other two species, *A. vulpinus* and *A. pelagicus* have 1 and 7 pseudoCR  
401 sequences, respectively. By contrast, *Isurus oxyrhincus* shows a large number of pseudoCR sequences  
402 (296) and perhaps one true CR. The species *I. paucus* also is dominated by pseudoCR sequences  
403 (n=9), with two valid CR.

#### 404 Using pseudogenes in fin identifications

405 We can still use these pseudo-CR sequences in fin identification. First, we find fins that have been  
406 identified as *Isurus* or *Alopias* species by their COI sequences. Then we use the CR sequences from  
407 these as references to identify species-specific clades of pseudo-CR sequences from other fins.  
408 Effectively, this uses the COI identifications as a reference set of fins from which we derive species-  
409 specific pseudo-CR data sets. This assignment identifies 305 sequences from *I. oxyrhincus*, 9 from *I.*  
410 *paucus*, 14 from *A. superciliosus*, and 8 from *A. pelagicus* (Fig. 7). These pseudogene numbers are in  
411 addition to the numbers of valid CR sequences: *I. oxyrhincus* =1, *I. paucus* =2, *A. superciliosus* =72,  
412 and *A. pelagicus* =0. However, an analysis of both data sets, (Fig. 8 see below), suggests caution in

413 using CR sequences because species with these pseudogenes are seen in many fewer fins than  
414 suggested by the COI data set.

#### 415 Good CR amplifications for bacterial-laden samples

416 In our COI data set, 369 samples provided bacterial sequences. Of these, 284 amplified with our CR  
417 primers, and 236 provided good CR sequence, demonstrating that these samples retained shark  
418 mtDNA despite bacterial contamination. Most of these samples were from wet ceratotrichia  
419 collections that had been stored at room temperature for weeks to months before processing. This  
420 category of specimen is rare in shark fin samples. The species composition was similar to the  
421 composition from the rest of the CR data set. Six samples BLASTed to *Megachasma pelagios* at low  
422 similarity (80%), suggesting these were Lamnid sequences. Forty-eight sequences amplified the CR  
423 region but did not return good sequence.

#### 424 Comparison of CR and COI identities

425 In our data set of 1528 CR sequences with strong matches to Genbank, we also have COI data for 802.  
426 Of these, 669 show a match between the species identities derived from the two different genes.  
427 However, 133 show a high (>95%) match to a reference control region sequence but show a different  
428 species match (also at high % identity) for COI. This mismatch calls into question these sequence  
429 identifications. To resolve this, we re-sequenced a set of these mismatched samples for the  
430 mitochondrial 16S gene or cytochrome b and found that the 16S species identity matches the COI  
431 identity in about half the cases, and matches the CR identity in the other half. There are ten cases in  
432 which a third species is discovered this way. As a result of the uncertainty that this causes in species  
433 identifications, we have removed these sequences from our compilations.

#### 434 Summary across all analyses

435 Table 2 compiles the species names derived from the CR data set, including cases where CR and COI  
436 labels match, when they do not match, and when we do not have COI data. We then show the species  
437 totals in Table 1, not including the cases where CR and COI sequences have high identity but do not  
438 match.

439 Overall, we can identify 969 fin products by COI sequence as belonging to 38-41 species,  
440 including 16-18 species of *Carcharinus*. We also identified 1,736 fins using control region sequences,  
441 showing 41-43 species, including the vast majority of the species from the COI data set. Table 1  
442 shows that the most common species are thresher sharks, mako sharks, hammerhead and blue sharks,  
443 ocean species that have been seen widely in prior surveys of shark fin markets (e.g., Clarke et al.,  
444 2006). However, we also see a large number of samples and species of coastal requiem sharks in the  
445 genus *Carcharhinus*, as well as a diverse collection of hammerheads in seven of eight named species.  
446 The species targeted by the single biggest US shark fishery, spiny dogfish, does not appear among any  
447 of our fin products.

448 The species list in our shop data sets (summarized in Table 1) include 14-20 vulnerable  
449 species (IUCN Red list) and 3 endangered species. Six additional species the IUCN considers data  
450 deficient, and 6 species are specifically regulated under CITES. Altogether, the vulnerable,  
451 endangered and CITES species make up 36% of the species and 56% (CR) to 66% (COI) of the  
452 individual fin products. Of the CITES listed species, only the whale shark, basking shark and  
453 porbeagle (*Lamna nasus*) are not in our DNA sequence collection.

454 The Lamnid shark group and the hammerhead group have high fractions of vulnerable,  
455 endangered or CITES regulated species, and both have high frequency in our sample. Likewise, seven  
456 of eight named hammerhead species are in our data set, including all five vulnerable, endangered or  
457 CITES regulated species. Only the newly described endemic *S. gilbert* is not in our data set.

458 Yet our data also show a wide variety of sharks that have not yet caught conservation  
459 attention, including a number of *Carcharhinus* species. We see 16-18 species of *Carcharhinus* sharks  
460 with an average number of individuals per species of 21 and 48 for COI and CR, respectively. These  
461 include widely ranging sharks such as the blacktip (*C. limbatus*), sandbar (*C. plumbeus*) and dusky  
462 sharks (*C. obscurus*). But we also see large numbers of more restricted species such as the shorttail  
463 shark (*C. porosus*) which lives in muddy estuaries in the western Atlantic, the blacknose (*C.*  
464 *acronotus*), inhabiting sandy habitats in the same regions, and the sharpnosed sharks (genus  
465 *Rhizopionodon*) found in Atlantic or Caribbean waters. Coastal sharks such as these are in contrast to  
466 the oceanic, pelagic sharks that have been the focus of a large shark fin fishery and large shark fin  
467 concern. Our data confirm that the diversity of coastal sharks is also a target of active shark finning.

468

## 469 DISCUSSION

470 Our data show a large variety of sharks with great taxonomic diversity across the retail market sample.  
471 The COI data set provides identification of 36-39 species of sharks, including 17-19 *Carcharhinus*  
472 species, from 963 fin products. Likewise, the Control Region data set shows 38-41 species, including  
473 the vast majority of the species from the COI data set.

474 These species represent a large fraction of the known endangered, vulnerable or data deficient  
475 sharks in the world: more than 20 species in those categories occur in our data set. Moreover, 56-66%  
476 of the fins in our data set derive from these categories of sharks, largely because of the preponderance  
477 of thresher, mako and hammerhead sharks in the sample.

478 Our data bolster several recent retail market surveys that have also concluded that the shark fin  
479 market is highly diverse and highly endangered (Cardeñosa et al., 2018; Feitosa et al., 2018; Fields et  
480 al., 2018; Steinke et al., 2017). Steinke et al. (2017) found 20 species in 72 shark samples from  
481 Vancouver, Canada. Fields et al. (2018) found 59 species and 17 higher taxonomic groups when they  
482 monitored 3,952 samples from Hong Kong retail shops from 2014-2015. Similarly, Cardeñosa et al.  
483 (2018) found 82 species and species complexes in Hong Kong among small fin discards in 2016.  
484 Feitosa et al. (2018) found 17 predominantly nearshore species from 427 fin samples collected in  
485 northeastern Brazil. In these cases, and the samples reported here, some similarities emerge. All  
486 samples show a large number of endangered and threatened species. Thresher, hammerhead and mako  
487 sharks are abundant (especially *Alopias superciliosus*, *Sphyrna lewini*, and *Isurus oxyrinchus*).  
488 Abundant *Carcharhinus* samples include *C. falciformis*, *C. limbatus*, and *C. longimanus*, though there  
489 is a wide variety of other *Carcharhinus* species – generally at low and variable abundance - in the  
490 larger samples.

491 There are also some striking differences. The *Alopias/Isurus* group dominates the small  
492 Steinke sample (Table 1). The *Alopias/Isurus* group is also abundant in our sample, dominated by *A.*  
493 *superciliosus* and *I. oxyrinchus*. Yet in the Hong Kong shops sampled by Fields et al. (2018) and  
494 Cardeñosa et al. (2018), this group is a minor component. By contrast, the Fields et al. (2018) and  
495 Cardeñosa et al. (2018) samples are dominated by blue sharks, a single species in the Carcharhinidae  
496 that makes up nearly half their samples. Blue sharks occur in our sample, and in Steinke et al. (2017),  
497 at about 2-10%. Blue sharks also dominated the earlier sample of Clarke et al. (2006) from the Hong  
498 Kong wholesale market, prompting Fields et al. (2018) to ask how blue sharks could maintain their  
499 market presence at such a high level for so long. The relatively lower number of blue shark fins in  
500 retail markets on the US west coast may partially answer this question if there is a strong regional  
501 difference in market availability of this species. No blue sharks occur in the Brazil samples, which is  
502 dominated by regional sharpnose and *Carcharhinus* species (Feitosa et al., 2018).

503 *Comparison across genes and methods*

504 There is strong evidence from these data that the CR and COI generally produce data equivalently well  
505 for most sharks, but that using CR primers specifically underestimates thresher shark abundance. The  
506 number of shark fins in our COI data set for each species is highly correlated to the number of fins we  
507 find with our CR primers ( $r^2=0.91$ , Fig. 8). However there are two strong outliers. For both *Alopias*  
508 *superciliosus* and *A. pelagicus* the number of fins observed with CR primers, even taking in to account  
509 the fins identified with pseudo-gene CR sequences - falls far below the line relating COI and CR  
510 results (Fig. 8).

511 These outliers are because *Alopias* fins defined by COI sequences frequently fail to show *Alopias* CR  
512 sequences: 48 of the 208 *Alopias* fins with COI sequences have CR sequences with high identity to a  
513 different species, all *C. falciiformis*, *C. obscurus*, and *C. longimanus* (see Table 3). These CR  
514 sequences are not *Alopias* pseudo-genes. Our hypothesis is that these CR identifications are incorrect,  
515 and derive from failure of the CR primers to easily amplify *Alopias* CR regions, amplifying common  
516 *Carcharhinus* species DNA as lab contaminants.

517 The lowest red point in Figure 8 represents very different identification rates for COI and CR for *A.*  
518 *pelagicus*: COI data show 38 fins for this species out of a total of 963 fins, but we find only 8 out of  
519 1736 CR sequences. Lab records show that failure rate of CR amplifications of fins that have a  
520 *pelagicus* COI sequences is high. We searched for a possible explanation for this underrepresentation  
521 and found that the reverse primer from (Giles et al., 2016) does not match *A. pelagicus* at four of 22  
522 positions, making it a poor amplification tool (Fig. 9). The match to *A. superciliosus* is better: 21 of 22  
523 bases match. But the 3' end base, the most crucial one for the polymerase chain reaction, does not  
524 match. This may make this primer less valuable for this species as well.

#### 525 *Conservation status*

526 Our data confirm the strong abundance of endangered, vulnerable and CITES listed shark species in  
527 retail fin markets. As in previous surveys, we find about half the fins come from species of  
528 conservation concern. This consistency is particularly important because it spans very different types  
529 of retail markets, in Hong Kong and the US west coast, imbedded in very different fisheries cultures  
530 and retail markets. In particular, the US has made strong strides in recent years in regulating fisheries,  
531 and returning overfished stocks to sustainability (Barner et al., 2015). Yet the shark markets in the US  
532 and Hong Kong remain quite similar in the presence of protected species. This suggests that fisheries  
533 policy improvements in the US have not penetrated the fin trade, and that highly regulated US  
534 fisheries do not contribute much to the retail fin market. This suggestion is supported by lack of fins  
535 from the biggest US shark fishery, spiny dogfish (*squalus acanthias*), both in the US west coast and  
536 Hong Kong retail fin market (Cardeñosa et al., 2018; Feitosa et al., 2018; Fields et al., 2018; Steinke et  
537 al., 2017).

538 There have been a series of other questions asked of the global shark fishery, notably about the  
539 persistence of some abundant fins on the global market from the same species for over a decade  
540 (Davidson, Krawchuk, & Dulvy, 2016; Fields et al., 2018). For example, blue sharks were a dominant  
541 feature of the Hong Kong market as shown in (Clarke et al., 2006), and again a decade later  
542 (Cardeñosa et al., 2018; Fields et al., 2018). Such dominance of a global market by a single species  
543 might suggest higher sustainability for this species than thought originally. However, our data show  
544 many fewer blue sharks, in contrast to nearly 50% of the samples being blue sharks in the Hong Kong  
545 retail market (Cardeñosa et al., 2018; Fields et al., 2018), we show no more than 4% in our survey.  
546 Likewise, bull sharks and sickle fin lemon sharks are at a much higher percentage in the Hong Kong  
547 market than in the US west coast. By contrast, our data show a higher abundance of bigeye thresher  
548 and the Atlantic smalltail sharks than seen in Hong Kong. These differences suggest that a single  
549 market can provide an incomplete picture of the global trade and call for more coordinated fin testing  
550 at high levels of sampling.

551



552 **ACKNOWLEDGMENTS**

553 J. Giles provided assistance with data collection, technical issues, and laboratory supervision.

554

555 **FUNDING**

556 This research was supported through generous contributions to the Monterey Bay Aquarium.

557

558 **COMPETING INTERESTS**

559 The authors declare there are no competing interests. Stephen Palumbi is an employee of Stanford  
560 University. Salvador Jorgensen and Kyle Van Houtan are employees of the Monterey Bay Aquarium.

561

562 **AUTHOR CONTRIBUTIONS**

563 SP oversaw data collection experiments, analyzed the data, contributed reagents/materials/analysis  
564 tools, and prepared figures and tables.

565

566 KR collected data and performed lab work.

567

568 SP, SJ, KV, KR conceived and designed the experiments, authored or reviewed drafts of the paper,  
569 and approved the final draft.

570

571 **DATA AVAILABILITY**

572 All data and supplemental files are available open-access via the Open Science Framework, available  
573 at <https://osf.io/9d65y/> and through the following DOI:10.17605/OSF.IO/9D65Y.

574

575 **SUPPLEMENTAL INFORMATION**

576 Supplemental information for this article can be found online.

577

578 **REFERENCES**

- 579 Avise, J. C. (2012). *Molecular markers, natural history and evolution*: Springer Science & Business Media.
- 580 Barner, A. K., Lubchenco, J., Costello, C., Gaines, S. D., Leland, A., Jenks, B., . . . Spring, M. (2015). Solutions for  
581 recovering and sustaining the bounty of the ocean: combining fishery reforms, rights-based fisheries management,  
582 and marine reserves. *Oceanography*, 28(2), 252-263.
- 583 Baum, J. K., Myers, R. A., Kehler, D. G., Worm, B., Harley, S. J., & Doherty, P. A. (2003). Collapse and conservation of  
584 shark populations in the Northwest Atlantic. *Science*, 299(5605), 389-392.
- 585 Bensasson, D., Zhang, D.-X., Hartl, D. L., & Hewitt, G. M. (2001). Mitochondrial pseudogenes: evolution's misplaced  
586 witnesses. *Trends Ecol Evol*, 16(6), 314-321.
- 587 Cardeñosa, D., Fields, A. T., Babcock, E. A., Zhang, H., Feldheim, K., Shea, S. K. H., . . . Chapman, D. D. (2018). CITES-  
588 listed sharks remain among the top species in the contemporary fin trade. *Conservation Letters*, 11(4), e12457.  
589 doi:doi:10.1111/conl.12457
- 590 Clarke, S. C., Magnussen, J. E., Abercrombie, D. L., McAllister, M. K., & Shivji, M. S. (2006). Identification of shark  
591 species composition and proportion in the Hong Kong shark fin market based on molecular genetics and trade  
592 records. *Conservation Biology*, 20(1), 201-211.
- 593 Davidson, L. N., Krawchuk, M. A., & Dulvy, N. K. (2016). Why have global shark and ray landings declined: improved  
594 management or overfishing? *Fish and Fisheries*, 17(2), 438-458.
- 595 Dulvy, N. K., Baum, J. K., Clarke, S., Compagno, L. J. V., Cortés, E., Domingo, A., . . . Valenti, S. (2008). You can swim  
596 but you can't hide: the global status and conservation of oceanic pelagic sharks and rays. *Aquatic Conservation:  
597 Marine and Freshwater Ecosystems*, 18(5), 459-482. doi:doi:10.1002/aqc.975
- 598 Dulvy, N. K., Fowler, S. L., Musick, J. A., Cavanagh, R. D., Kyne, P. M., Harrison, L. R., . . . Francis, M. P. (2014).  
599 Extinction risk and conservation of the world's sharks and rays. *elife*, 3, e00590.
- 600 Feitosa, L. M., Martins, A. P. B., Giarrizzo, T., Macedo, W., Monteiro, I. L., Gemaque, R., . . . Carvalho-Costa, L. F. (2018).  
601 DNA-based identification reveals illegal trade of threatened shark species in a global elasmobranch conservation  
602 hotspot. *Scientific reports*, 8(1), 3347. doi:10.1038/s41598-018-21683-5
- 603 Fields, A. T., Fischer, G. A., Shea, S. K., Zhang, H., Abercrombie, D. L., Feldheim, K. A., . . . Chapman, D. D. (2018).  
604 Species composition of the international shark fin trade assessed through a retail-market survey in Hong Kong.  
605 *Conservation Biology*, 32(2), 376-389.
- 606 Giles, J. L., Riginos, C., Naylor, G. J., & Ovenden, J. R. (2016). Genetic and phenotypic diversity in the wedgetfish  
607 *Rhynchobatus australiae*, a threatened ray of high value in the shark fin trade. *Marine Ecology Progress Series*,  
608 548, 165-180.
- 609 Jenkins, C. N., & Van Houtan, K. S. (2016). Global and regional priorities for marine biodiversity protection. *Biological  
610 Conservation*, 204, 333-339.
- 611 Katoh, K., & Standley, D. M. (2013). MAFFT multiple sequence alignment software version 7: improvements in  
612 performance and usability. *Molecular biology and evolution*, 30(4), 772-780.
- 613 Martin, S. L., Van Houtan, K. S., Jones, T. T., Aguon, C. F., Gutierrez, J. T., Tibbatts, R. B., . . . Bass, J. D. (2016). Five  
614 Decades of Marine Megafauna Surveys from Micronesia. *Frontiers in Marine Science*, 2(116).  
615 doi:10.3389/fmars.2015.00116
- 616 Pardini, A. T., Jones, C. S., Noble, L. R., Kreiser, B., Malcolm, H., Bruce, B. D., . . . Francis, M. (2001). Sex-biased dispersal  
617 of great white sharks. *Nature*, 412(6843), 139.
- 618 Quattro, J. M., Driggers III, W. B., Grady, J. M., Ulrich, G. F., & MA, R. (2013). *Sphyrna gilbert* sp. Nov., a new  
619 hammerhead shark (Carcharhiniformes, Sphyrnidae) from the western Atlantic Ocean. *Zootaxa*, 3702(2), 159-178.
- 620 Sadovy de Mitcheson, Y., Andersson, A. A., Hofford, A., Law, C. S. W., Hau, L. C. Y., & Pauly, D. (2018). Out of control  
621 means off the menu: The case for ceasing consumption of luxury products from highly vulnerable species when  
622 international trade cannot be adequately controlled; shark fin as a case study. *Marine Policy*.  
623 doi:<https://doi.org/10.1016/j.marpol.2018.08.012>
- 624 Steinke, D., Bernard, A. M., Horn, R. L., Hilton, P., Hanner, R., & Shivji, M. S. (2017). DNA analysis of traded shark fins  
625 and mobulid gill plates reveals a high proportion of species of conservation concern. *Scientific reports*, 7(1), 9505.
- 626 Ward, R. D., Zemlak, T. S., Innes, B. H., Last, P. R., & Hebert, P. D. (2005). DNA barcoding Australia's fish species.  
627 *Philosophical Transactions of the Royal Society of London B: Biological Sciences*, 360(1462), 1847-1857.
- 628 Wong, E. H. K., Shivji, M. S., & Hanner, R. H. (2009). Identifying sharks with DNA barcodes: assessing the utility of a  
629 nucleotide diagnostic approach. *Molecular Ecology Resources*, 9, 243-256.
- 630 Worm, B., Davis, B., Kettner, L., Ward-Paige, C. A., Chapman, D., Heithaus, M. R., . . . Gruber, S. H. (2013). Global  
631 catches, exploitation rates, and rebuilding options for sharks. *Marine Policy*, 40, 194-204.
- 632

638 Table 1: COI and CR sequences identifications for this study, compared to recently published studies.

| TAXON GROUP       | FAMILY NAME        | GENUS NAME            | SPECIES NAME                 | COMMON NAME               | MBA COI | MBA CR | STIENKE COI | FIELDS COI | FEITOSA COI | IUCN STATUS | CITES STATUS |
|-------------------|--------------------|-----------------------|------------------------------|---------------------------|---------|--------|-------------|------------|-------------|-------------|--------------|
| thresher sharks   | Alopiidae          | <i>Alopias</i>        | <i>pelagicus</i>             | pelagic thresher shark    | 38      | 8      | 12          | 19         | --          | VU          | II           |
| thresher sharks   | Alopiidae          | <i>Alopias</i>        | <i>superciliosus</i>         | bigeye thresher shark     | 170     | 95     | 8           | 37         | --          | VU          | II           |
| thresher sharks   | Alopiidae          | <i>Alopias</i>        | <i>vulpinus</i>              | common thresher shark     | 1       | 1      | 1           | 2          | --          | VU          | II           |
| lamnid sharks     | Lamnidae           | <i>Isurus</i>         | <i>paucus</i>                | longfin mako shark        | 12      | 11     | 3           | 4          | --          | VU          | --           |
| lamnid sharks     | Lamnidae           | <i>Isurus</i>         | <i>oxyrinchus</i>            | shortfin mako shark       | 168     | 306    | 8           | 133        | --          | VU          | --           |
| lamnid sharks     | Lamnidae           | <i>Lamna</i>          | <i>ditropis</i>              | salmon shark              | 1       | 1      | 3           | 17         | --          | LC          | --           |
| lamnid sharks     | Lamnidae           | <i>Lamna</i>          | <i>nasus</i>                 | porbeagle shark           | --      | 0      | 5           | 6          | --          | VU          | II           |
| lamnid sharks     | Lamnidae           | <i>Carcharodon</i>    | <i>carcharias</i>            | white shark               | 0       | 1      | --          | --         | --          | VU          | II           |
| ground sharks     | Triakidae          | <i>Mustelus</i>       | <i>canis</i>                 | dusky smooth-hound        | 1       | --     | --          | 3          | 8           | NT          | --           |
| ground sharks     | Triakidae          | <i>Mustelus</i>       | <i>lunulatus</i>             | sicklefin smooth-hound    | 1       | --     | 1           | 17         | --          | LC          | --           |
| ground sharks     | Triakidae          | <i>Mustelus</i>       | <i>mustelus</i>              | common smooth-hound       | --      | --     | --          | 10         | --          | VU          | --           |
| ground sharks     | Triakidae          | <i>Mustelus</i>       | <i>mosis</i>                 | Arabian smooth-hound      | --      | --     | --          | 12         | --          | DD          | --           |
| ground sharks     | Triakidae          | <i>Mustelus</i>       | <i>higmani</i>               | smalleye smooth-hound     | 0       | 0      | 0           | 0          | 8           | LC          | --           |
| requiem sharks    | Galeorhinidae      | <i>Galeorhinus</i>    | <i>galeus</i>                | school shark              | 8       | --     | --          | 19         | --          | VU          | --           |
| requiem sharks    | Carcharhinidae     | <i>Rhizoprionodon</i> | <i>porosus/terraenovae</i>   | Caribbean sharpnose shark | 27      | 27     | 1           | 17         | 142         | LC          | --           |
| requiem sharks    | Carcharhinidae     | <i>Rhizoprionodon</i> | <i>acutus</i>                | milk shark                | --      | --     | 3           | 66         | --          | LC          | --           |
| requiem sharks    | Carcharhinidae     | <i>Rhizoprionodon</i> | <i>longurio</i>              | Pacific sharpnose shark   | --      | --     | --          | 7          | --          | DD          | --           |
| requiem sharks    | Carcharhinidae     | <i>Rhizoprionodon</i> | <i>lalandii</i>              | Brazilian sharpnose shark | 0       | 0      | 0           | 0          | 1           | DD          | --           |
| carpet sharks     | Ginglymostomatidae | <i>Ginglymostoma</i>  | <i>cirratum</i>              | nurse shark               | 0       | 0      | 0           | 0          | 14          | DD          | --           |
| hammerheads       | Sphyrnidae         | <i>Sphyrna</i>        | <i>zygaena</i>               | smooth hammerhead         | 0       | 4      | --          | 165        | --          | VU          | II           |
| hammerheads       | Sphyrnidae         | <i>Sphyrna</i>        | <i>mokarran</i>              | great hammerhead          | 10      | 38     | 2           | 41         | 40          | EN          | II           |
| hammerheads       | Sphyrnidae         | <i>Sphyrna</i>        | <i>tiburo</i>                | bonnethead                | 11      | 11     | --          | 3          | 12          | LC          | --           |
| hammerheads       | Sphyrnidae         | <i>Sphyrna</i>        | <i>corona</i>                | scalloped bonnethead      | 11      | 6      | --          | 0.01       | --          | NT          | --           |
| hammerheads       | Sphyrnidae         | <i>Sphyrna</i>        | <i>lewini clade 1</i>        | scalloped hammerhead      | 10      | 24     | 7           | 0          | 18          | EN          | II           |
| hammerheads       | Sphyrnidae         | <i>Sphyrna</i>        | <i>lewini clade 2</i>        | scalloped hammerhead      | 56      | 92     | --          | 196        | --          | EN          | II           |
| hammerheads       | Sphyrnidae         | <i>Sphyrna</i>        | <i>media</i>                 | scoophead                 | 4       | 5      | --          | 0.01       | --          | DD          | --           |
| hammerheads       | Sphyrnidae         | <i>Sphyrna</i>        | <i>tudes</i>                 | smalleye hammerhead       | 20      | 38     | --          | 0.01       | 10          | VU          | --           |
| requiem sharks    | Carcharhinidae     | <i>Triaenodon</i>     | <i>obesus</i>                | whitetip reef shark       | 4       | 2      | --          | 1          | --          | NT          | --           |
| requiem sharks    | Carcharhinidae     | <i>Prionace</i>       | <i>glauca</i>                | blue shark                | 42      | 72     | 7           | 1632       | --          | NT          | --           |
| requiem sharks    | Carcharhinidae     | <i>Galeocerdo</i>     | <i>cuvier</i>                | tiger shark               | 6       | 15     | --          | 16         | 12          | NT          | --           |
| requiem sharks    | Carcharhinidae     | <i>Negaprion</i>      | <i>acutidens</i>             | sicklefin lemon shark     | 3       | 5      | 1           | 29         | --          | VU          | --           |
| requiem sharks    | Carcharhinidae     | <i>Negaprion</i>      | <i>brevirostris</i>          | lemon shark               | 3       | 54     | --          | 5          | --          | NT          | --           |
| ground sharks     | Hemigaleidae       | <i>Hemipristis</i>    | <i>elongata</i>              | snaggletooth shark        | --      | 0      | --          | 5          | --          | VU          | --           |
| requiem sharks    | Carcharhinidae     | <i>Lamiopsis</i>      | <i>temminckii</i>            | broadfin shark            | --      | 0      | --          | 4          | --          | EN          | --           |
| requiem sharks    | Carcharhinidae     | <i>Carcharhinus</i>   | <i>amblyrhynchus</i>         | grey reef shark           | 8       | 34     | 1           | 15         | --          | NT          | --           |
| requiem sharks    | Carcharhinidae     | <i>Carcharhinus</i>   | <i>signatus</i>              | night shark               | 1       | 1      | --          | 0          | --          | VU          | --           |
| requiem sharks    | Carcharhinidae     | <i>Carcharhinus</i>   | <i>brevipinna</i>            | spinner shark             | 12      | 22     | 1           | 55         | --          | NT          | --           |
| requiem sharks    | Carcharhinidae     | <i>Carcharhinus</i>   | <i>brachyurus</i>            | copper shark              | 1       | 1      | --          | 13         | --          | NT          | --           |
| requiem sharks    | Carcharhinidae     | <i>Carcharhinus</i>   | <i>melanopterus I</i>        | blacktip reef shark       | 4       | 8      | --          | 2          | --          | NT          | --           |
| requiem sharks    | Carcharhinidae     | <i>Carcharhinus</i>   | <i>longimanus</i>            | oceanic whitetip shark    | 26      | 64     | --          | 48         | --          | VU          | II           |
| requiem sharks    | Carcharhinidae     | <i>Carcharhinus</i>   | <i>melanopterus II</i>       | blacktip reef shark       | 3       | 0      | --          | 0          | --          | NT          | --           |
| requiem sharks    | Carcharhinidae     | <i>Carcharhinus</i>   | <i>leucas</i>                | bull shark                | 6       | 18     | --          | 87         | 17          | NT          | --           |
| requiem sharks    | Carcharhinidae     | <i>Carcharhinus</i>   | <i>perezii</i>               | Caribbean reef shark      | 1       | 20     | --          | 0.01       | --          | NT          | --           |
| requiem sharks    | Carcharhinidae     | <i>Carcharhinus</i>   | <i>falciformis</i>           | silky shark               | 59      | 127    | --          | 483        | 11          | NT          | II           |
| requiem sharks    | Carcharhinidae     | <i>Carcharhinus</i>   | <i>isodon</i>                | finetooth shark           | 15      | 18     | --          | 6          | --          | LC          | --           |
| requiem sharks    | Carcharhinidae     | <i>Carcharhinus</i>   | <i>galapagensis=obscurus</i> | Galapagos/Dusky           | 59      | 87     | 1           | 42         | --          | VU          | --           |
| requiem sharks    | Carcharhinidae     | <i>Carcharhinus</i>   | <i>acronotus</i>             | blacknose shark           | 12      | 61     | --          | 9          | 68          | NT          | --           |
| requiem sharks    | Carcharhinidae     | <i>Carcharhinus</i>   | <i>plumbeus=altimus</i>      | Sandbar/Bignose           | 19      | 72     | --          | 11         | --          | VU          | --           |
| requiem sharks    | Carcharhinidae     | <i>Carcharhinus</i>   | <i>limbatus</i>              | blacktip shark            | 97      | 254    | 1           | 219        | 9           | NT          | --           |
| requiem sharks    | Carcharhinidae     | <i>Carcharhinus</i>   | <i>porosus</i>               | smalltail shark           | 33      | 105    | --          | 2          | 42          | DD          | --           |
| requiem sharks    | Carcharhinidae     | <i>Carcharhinus</i>   | <i>amboinensis</i>           | pigeys shark              | --      | --     | --          | 54         | --          | DD          | --           |
| requiem sharks    | Carcharhinidae     | <i>Carcharhinus</i>   | <i>leiodon</i>               | smoothtooth shark         | --      | --     | 2           | --         | --          | VU          | --           |
| requiem sharks    | Carcharhinidae     | <i>Carcharhinus</i>   | <i>dussumieri</i>            | whitecheek shark          | --      | --     | --          | 14         | --          | NT          | --           |
| requiem sharks    | Carcharhinidae     | <i>Carcharhinus</i>   | <i>sorrah</i>                | spot-tail shark           | --      | --     | --          | 50         | --          | NT          | --           |
| requiem sharks    | Carcharhinidae     | <i>Carcharhinus</i>   | <i>albimarginatus</i>        | silvertip shark           | --      | --     | --          | 5          | --          | VU          | --           |
| requiem sharks    | Carcharhinidae     | <i>Carcharhinus</i>   | <i>macloti</i>               | hardnose shark            | --      | --     | --          | 6          | --          | NT          | --           |
| requiem sharks    | Carcharhinidae     | <i>Isogomphodon</i>   | <i>oxyrinchus</i>            | daggernose shark          | 0       | 0      | 0           | 0          | 14          | CR          | --           |
| requiem sharks    | Carcharhinidae     | --                    | --                           | --                        | 0       | 0      | --          | 114        | --          | NT          | --           |
| dogfishes         | Squalidae          | <i>Squalus</i>        | --                           | dogfishes                 | --      | --     | --          | 19         | --          | DD          | --           |
| dogfishes         | Squalidae          | <i>Squalus</i>        | <i>brevirostris/megalops</i> | shortnose spurdog         | 0       | 0      | 0           | 0          | 1           | DD          | --           |
| squaliform sharks | Centrophoridae     | <i>Deania</i>         | <i>profundorum</i>           | arrowhead dogfish         | --      | --     | --          | 4          | --          | LC          | --           |
| squaliform sharks | Dalatiidae         | <i>Dalatis</i>        | <i>licha</i>                 | kitefin shark             | --      | --     | --          | 53         | --          | NT          | --           |
| chimaeras         | Callorhynchidae    | <i>Callorhynchus</i>  | --                           | elephantfish              | --      | --     | --          | 27         | --          | LC          | --           |
| carpet sharks     | Hemiscylliidae     | <i>Chiloscyllium</i>  | --                           | bamboo sharks             | --      | --     | --          | 21         | --          | NT          | --           |
| chimaeras         | Chimaeridae        | <i>Hydrolagus</i>     | --                           | chimaeras                 | --      | --     | --          | 14         | --          | LC          | --           |
| whale shark       | Rhincodontidae     | <i>Rhincodon</i>      | <i>typus</i>                 | whale shark               | --      | --     | 4           | --         | --          | EN          | II           |
| wedgefishes       | Rhinidae           | <i>Rhynchobatus</i>   | [ Gulf species ]             | unk wedgefish             | --      | 1      | --          | --         | --          | VU          | --           |
| wedgefishes       | Rhinidae           | <i>Rhynchobatus</i>   | <i>laevis</i>                | smoothnose wedgefish      | --      | 4      | --          | --         | --          | VU          | --           |
| wedgefishes       | Rhinidae           | <i>Rhynchobatus</i>   | <i>australiae</i>            | whitespotted wedgefish    | --      | 6      | --          | 26         | --          | VU          | --           |
| wedgefishes       | Rhinidae           | <i>Rhynchobatus</i>   | <i>djiddensis</i>            | giant guitarfish          | --      | 1      | --          | --         | --          | VU          | --           |
| --                | Mixed rare         | 17 rare species       | --                           | --                        | --      | --     | --          | 26         | --          | --          | --           |

635 Table 2: Comparison of best BLAST or phylogenetic identification for CR and COI gene sequences.  
 636 CR=COI represents the number of fins that showed the same identification for both genes. CR<>COI  
 637 represents fins with identifications that do not match. No COI represents fins for which there is no  
 638 COI sequence. Refs is the number of reference sequences from Genbank in the phylogenyetic clades  
 639 defining species.  
 640

| Table 2: Clade and BLAST identification of CR sequences compared to COI |                                           |               |         |        |                          |      |                    |              |  |
|-------------------------------------------------------------------------|-------------------------------------------|---------------|---------|--------|--------------------------|------|--------------------|--------------|--|
|                                                                         | Clade                                     | CR=COI        | CR<>COI | No COI | total without<br>CR<>COI | Refs | Notes              | Taxon totals |  |
| Lamnid                                                                  | A. superciliosus                          | 39            | 0       | 33     | 72                       | 2    |                    |              |  |
|                                                                         | A. pelagicus                              | 0             | 0       | 0      | 0                        | 1    |                    |              |  |
|                                                                         | I. oxyrinchus                             | 1             | 0       | 0      | 1                        | 0    |                    |              |  |
|                                                                         | I. paucus                                 | 0             | 0       | 2      | 2                        | 3    |                    |              |  |
|                                                                         | L. ditropis                               | 1             | 0       | 0      | 1                        | 1    |                    |              |  |
|                                                                         | Carcharodon carchar                       | 0             | 0       | 1      | 1                        | 1    |                    | 77           |  |
| Hammerheads                                                             | S. lewini                                 | 46            | 2       | 70     | 116                      | 2    |                    |              |  |
|                                                                         | S. tudes                                  | 19            | 0       | 19     | 38                       | 2    |                    |              |  |
|                                                                         | S. media                                  | 0             | 4       | 5      | 5                        | 1    | 4 all tudes        |              |  |
|                                                                         | S. tiburo                                 | 7             | 0       | 4      | 11                       | 3    | refs in diff clade |              |  |
|                                                                         | S. corona                                 | 0             | 10      | 6      | 6                        | 1    | 10 all lewini      |              |  |
|                                                                         | S. mokarran                               | 9             | 0       | 29     | 38                       | 2    |                    |              |  |
|                                                                         | S. zygaena                                | 0             | 0       | 4      | 4                        | 2    |                    | 234          |  |
| Charchariacea                                                           | C. porosus                                | 28            | 2       | 77     | 105                      | 0    |                    |              |  |
|                                                                         | C. limbatus clade 1                       | 20            | 0       | 112    | 132                      | 0    |                    |              |  |
|                                                                         | C. limbatus clade 2                       | 74            | 5       | 48     | 122                      | 1    | wrong refl         |              |  |
|                                                                         | C. isodon                                 | 11            | 10      | 7      | 18                       | 6    |                    |              |  |
|                                                                         | C. noname 2                               | 1             | 3       | 15     | 16                       | 0    |                    |              |  |
|                                                                         | C. plumbeus                               | 14            | 4       | 58     | 72                       | 4    |                    |              |  |
|                                                                         | C. brachyurus                             | 1             | 0       | 0      | 1                        | 0    |                    |              |  |
|                                                                         | C. brevipinna                             | 12            | 0       | 10     | 22                       | 2    |                    |              |  |
|                                                                         | C. obscurus clade 1                       | 0             | 1       | 3      | 3                        | 0    |                    |              |  |
|                                                                         | C. obscurus clade 2                       | 51            | 25      | 33     | 84                       | 2    |                    |              |  |
|                                                                         | C. obscurus clade 3                       | 0             | 4       | 20     | 20                       | 1    | perezii?           |              |  |
|                                                                         | C. longimanus                             | 26            | 26      | 38     | 64                       | 2    |                    |              |  |
|                                                                         | C. melanopterus                           | 7             | 0       | 1      | 8                        | 2    |                    |              |  |
|                                                                         | C. acronotus                              | 11            | 3       | 50     | 61                       | 2    |                    |              |  |
|                                                                         | C. falciformis                            | 32            | 52      | 95     | 127                      | 2    |                    |              |  |
|                                                                         | C. noname 1                               | 0             | 2       | 0      | 0                        | 3    |                    |              |  |
|                                                                         | C. amblyrhynchus                          | 23            | 0       | 11     | 34                       | 0    |                    |              |  |
| C. leucas                                                               | 6                                         | 0             | 12      | 18     | 3                        |      | 1044               |              |  |
|                                                                         |                                           | 439           | 153     | 763    | 1202                     | 51   |                    | 1355         |  |
| Rhynchobatus                                                            | Rhynchobatus austra                       | 0             | 0       | 6      | 6                        | 3    |                    |              |  |
|                                                                         | Rhynchobatus cf.                          | 0             | 0       | 4      | 4                        | 2    |                    |              |  |
|                                                                         | Rhynchobatus Gulf                         | 0             | 0       | 1      | 1                        | 1    |                    |              |  |
|                                                                         | Rhynchobatus Red Se                       | 0             | 0       | 1      | 1                        | 1    |                    |              |  |
| Other genera                                                            | P. glauca                                 | 13            | 0       | 59     | 72                       | 1    |                    |              |  |
|                                                                         | Rhizoprionodon porosus                    | 23            | 0       | 2      | 25                       | 1    |                    |              |  |
|                                                                         | Rhizoprionodon terraen                    | 1             | 0       | 1      | 2                        | 1    |                    |              |  |
|                                                                         | Negaprion brevirostris                    | 3             | 0       | 51     | 54                       | 2    |                    |              |  |
|                                                                         | Negaprion acutidens                       | 3             | 0       | 2      | 5                        | 2    |                    |              |  |
|                                                                         | Triaenodon obesus                         | 2             | 0       | 0      | 2                        | 1    |                    |              |  |
|                                                                         | Galeocerdo cuvier                         | 5             | 0       | 10     | 15                       | 2    |                    |              |  |
|                                                                         | Pseudogene sequences (BLAST to Megamouth) |               |         |        |                          |      |                    |              |  |
|                                                                         |                                           | I. oxyrinchus |         | 135    | 161                      | 296  |                    |              |  |
|                                                                         |                                           | I. paucus     |         | 6      | 3                        | 9    |                    |              |  |
|                                                                         | A. superciliosus                          | 3             | 8       | 2      | 13                       |      |                    |              |  |
|                                                                         | A. pelagicus                              | 0             | 6       | 1      | 7                        |      |                    |              |  |
|                                                                         | A. vulpinus                               | 0             | 1       | 0      | 1                        |      |                    |              |  |
| Pseudogene sequences BLAST to Alopias                                   |                                           |               |         |        |                          |      |                    |              |  |
|                                                                         | A. pelagicus                              | 1             |         |        | 1                        |      |                    |              |  |
|                                                                         | I. oxyrinchus                             | 0             | 6       | 3      | 9                        |      | 86 % bootstrap     |              |  |
|                                                                         | A. superciliosus                          | 3             | 0       | 0      | 3                        |      |                    |              |  |
| Pseudogene sequences BLAST to P. kamoharai                              |                                           |               |         |        |                          |      |                    |              |  |
|                                                                         | A. superciliosus                          | 0             | 5       | 2      | 7                        |      |                    |              |  |
|                                                                         |                                           |               |         |        | 0                        |      |                    |              |  |
| All pseudogenes                                                         |                                           | 7             | 167     | 172    | 346                      | 0    |                    | 346          |  |
|                                                                         |                                           |               |         |        | 0                        |      |                    |              |  |
|                                                                         |                                           | 496           | 167     | 1072   | 1568                     | 68   | 1735               | 1389         |  |

641  
642



643 Table 3: Fins with high fidelity COI sequence identifications (left column) that have different CR  
644 identifications, mostly to three species of common *Carcharhinus* sharks.  
645

646

647

648

649

650

651

652

653

654

| COI identity:         | Total | Identity of CR sequence: |                        |                      |       |
|-----------------------|-------|--------------------------|------------------------|----------------------|-------|
|                       |       | <i>C.falciformis</i> CR  | <i>C.longimanus</i> CR | <i>C.obscurus</i> CR | other |
| All                   | 133   | 57                       | 28                     | 25                   | 23    |
| <i>Alopias</i> COI    | 48    | 15                       | 16                     | 17                   | 0     |
| <i>Galeocerdo</i> COI | 8     | 1                        | 2                      | 2                    | 3     |
| <i>Isurus</i>         | 34    | 33                       | 1                      | 0                    | 0     |
| <i>Prionace</i>       | 17    | 2                        | 9                      | 6                    | 0     |
| Other                 | 26    | 6                        | 0                      | 0                    | 20    |

655 **FIGURE LEGENDS**

656 Figure 1A: All COI tree with bootstraps. All phylogenetic trees are expandable jpg files. Each shows  
657 our market samples labeled as 'DCA' plus a sample number, followed by the best BLAST search of  
658 the COI sequence from that sample, where available, then the best BLAST search of the CR sequence  
659 from that sample.

660  
661 Figure 1B: Carcharhinus COI tree with bootstraps.

662  
663 Figure 2: Other genera CR tree

664  
665 Figure 3: Carcharhinus CR tree

666  
667 Figure 4: Sphyrna CR tree.

668  
669 Figure 5: Unexpected amplification of pseudogenes. The figure shows phylogenetic relationships  
670 among mitochondrial control region sequences (red labels) from Genbank and sequences from MBAq  
671 fins derived from our control region primers (black labels). The top black-labelled cluster of sequences  
672 from *Alopias* and *Isurus* species are 20-25% divergent from known mitochondrial sequences from the  
673 same species. These black-labelled sequences are probably mitochondrial pseudogenes, sequences  
674 originally from the mitochondria that were passed into the nucleus long ago and no longer function.  
675 One exception is a set of *Alopias superciliosus* sequences from our data set that appear to be valid  
676 control region sequences.

677  
678 Figure 6: Lamnid CR sequence tree. Sequences that amplify with CR primer and that cluster with CR  
679 sequences from whole mitochondrial genomes are shown in the lower clade, suggesting that these  
680 sequences are from true Control Regions section of mtDNA. The upper clade, starting with  
681 DCA\_0857 are CR amplified sequences that are highly divergent, suggesting they are pseudogene  
682 sequences.

683  
684 Figure 7: Numerous sequences amplified with CR primers from lamnid sharks that form a clade  
685 separate from the clade defined by vouchered whole mitochondrial genomes. These sequences have  
686 only a best match of 70-80% match to *M. pelagios* or *P. kamoharai* or *C. Taurus*, and group together  
687 with the putative pseudogene sequences in the upper clades of Figures 5 and 6. We use the species  
688 identification of a subset of these fins based on COI to define species clades, and use membership of a  
689 fin in one of these clades to assign the species name to that fin. For example, the first sequence at the  
690 top of this tree (DCA1\_0566) came from a fin with a COI sequence with a 99% match to *A. pelagicus*.  
691 Another fin (DCA1\_2250) is in this pseudo-CR sequence clade but has no COI sequence. We can use  
692 the presence of DCA1\_2250 in this clade as good evidence that it is a fin from *A. pelagicus* as well.

693  
694 Figure 8: Good correlation between the number of fins seen for each species based on COI data (x-  
695 axis) compared to the control region (CR) data (y-axis). Two exceptions (red dots) are two species of  
696 *Alopias*, which appear to be underestimated with CR primers compared to COI primers.

696  
697 Figure 9: Mismatch between our reverse Control Region primer and the mitochondrial sequence of  
698 *Alopias pelagicus* may explain the strong underestimate of this species in our CR data set. The reverse  
699 CR primer is shown as the reverse complement of the synthesized reverse primer to correspond to the  
700 published sequence.

Figure 1A

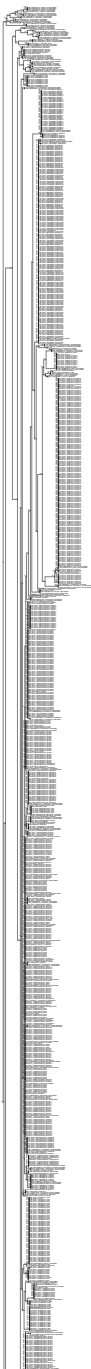

Figure 1B

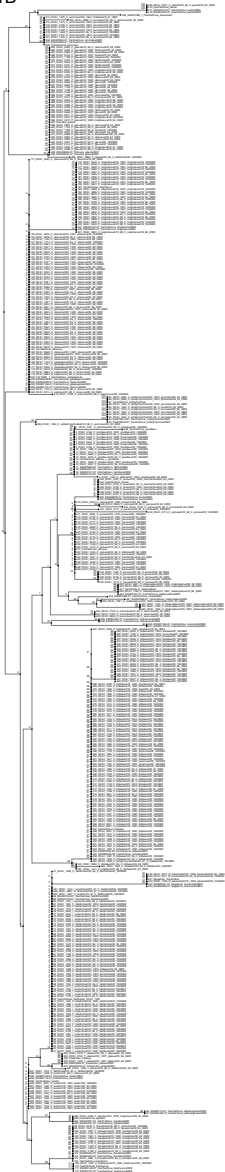



Figure 2

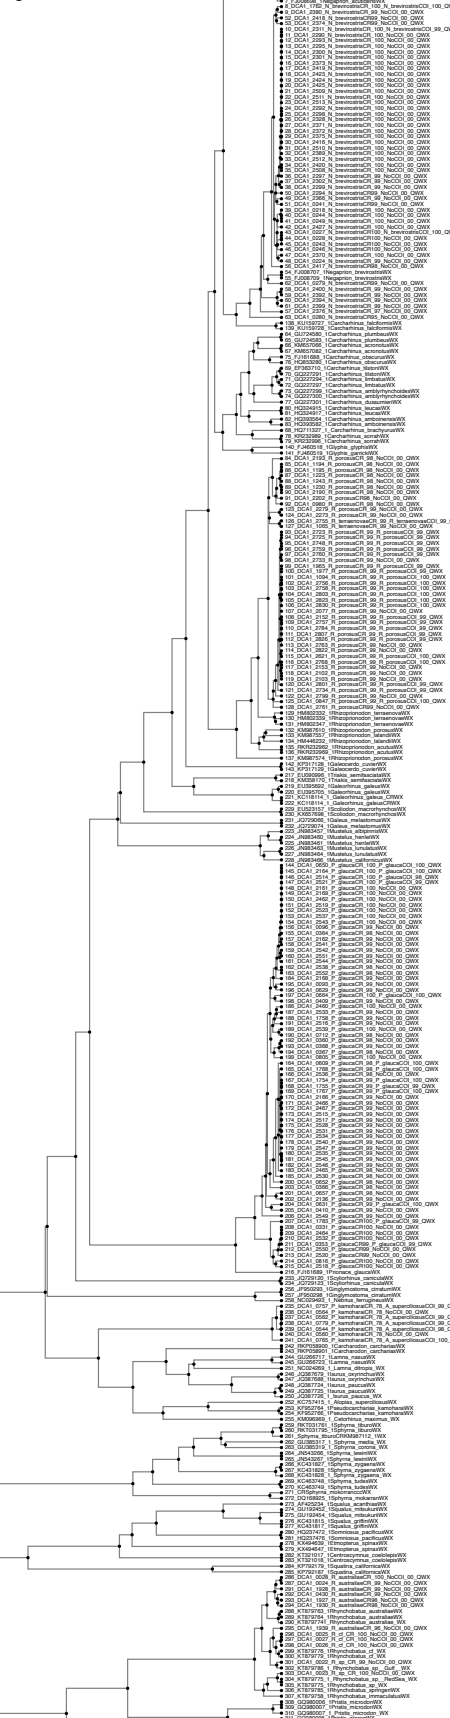

Figure 3

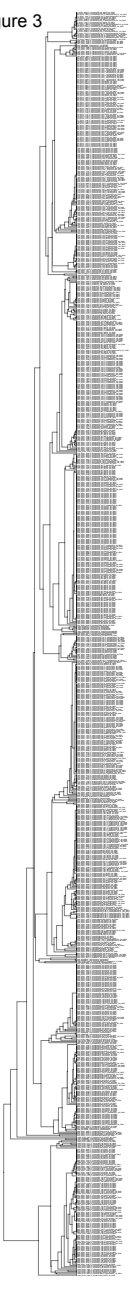



Figure 5

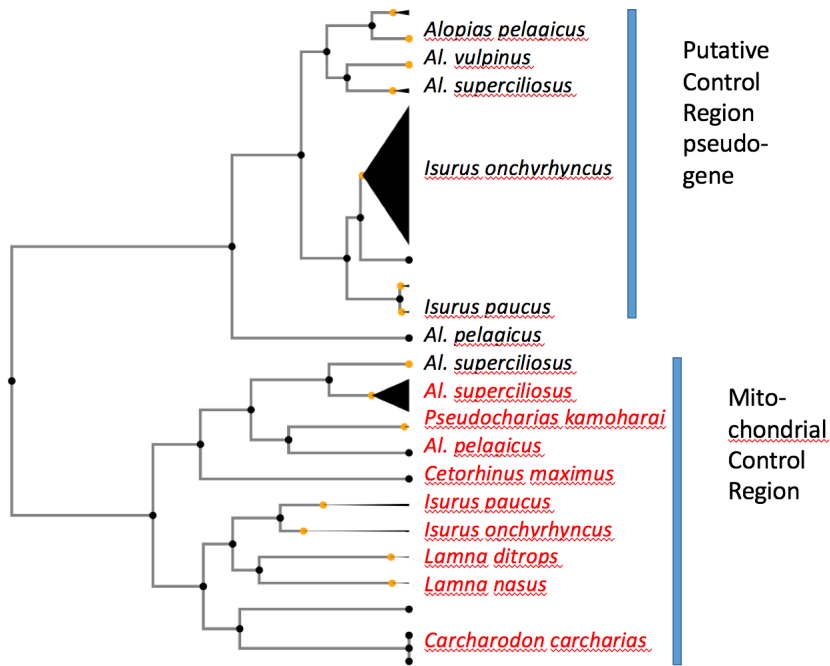



Figure 6

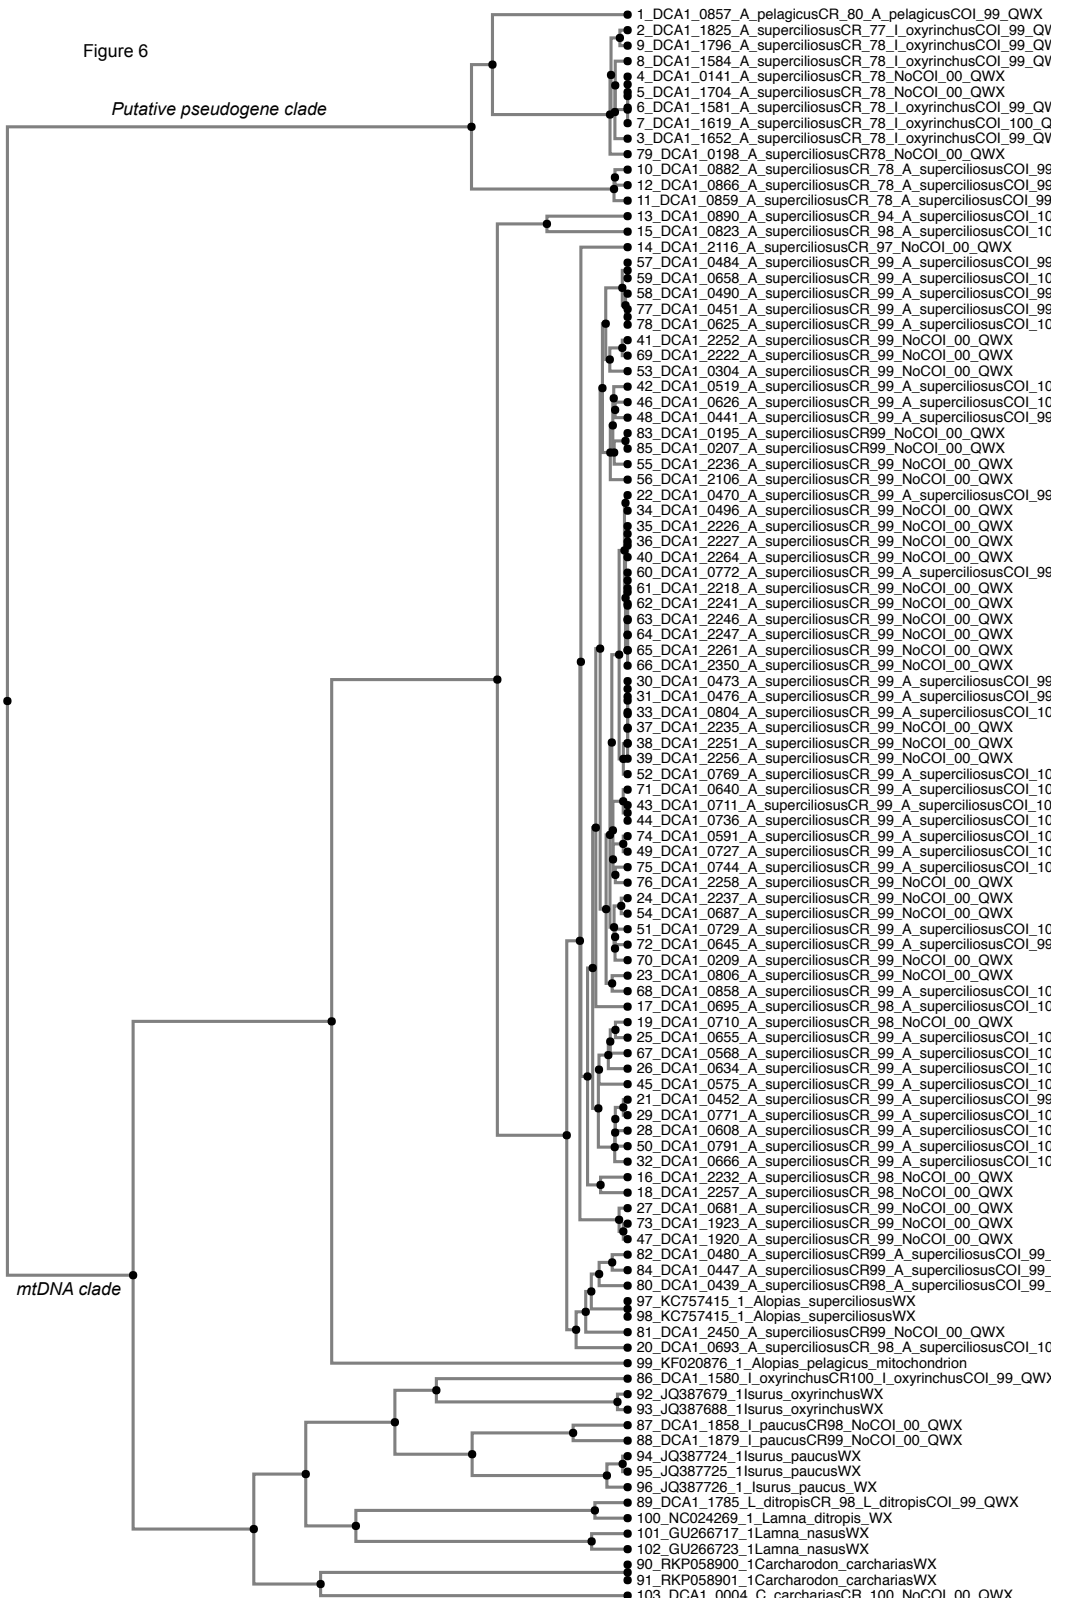



Figure 8

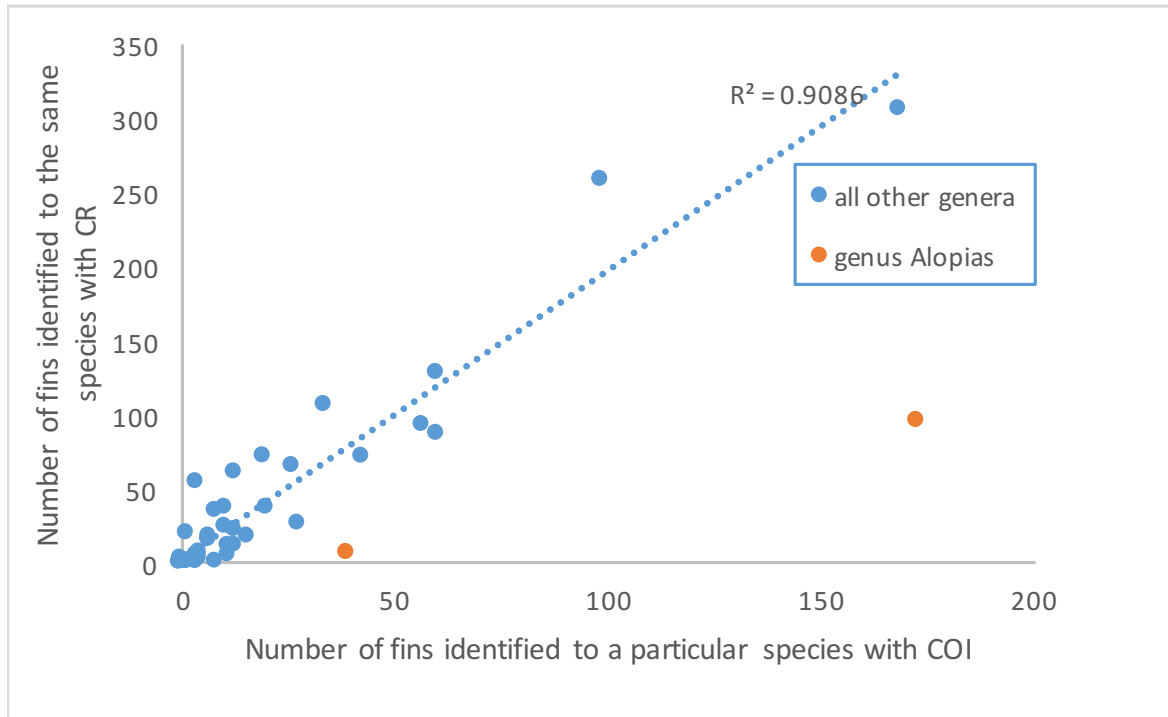

Figure 9

A. pelagicus TACCCTAGCTCCCTTTTATGCC  
\*\_\*\*\*\*\*\_\*\*\*\*\*\_\*\*\*\_\*  
Reverse CR primer TCCYCTAGTTCCTTTAATGGC
